# Supplementary material for: Tobacco smoking is associated with DNA methylation of diabetes susceptibility genes
Source: PubMed Central journal article supplement (PMC4826423; doi:10.1007/s00125-016-3872-0), 2016-01-29
Supplement: 125_2016_3872_MOESM2_ESM.pdf [file 125_2016_3872_MOESM2_ESM.pdf]

**Table S1. Clinical characteristics of the replication population**

|                                    | <i>Smoking category</i> |                |               |              | <i>P</i> <sup>a</sup> |
|------------------------------------|-------------------------|----------------|---------------|--------------|-----------------------|
|                                    | <b>Total</b>            | <b>Current</b> | <b>Former</b> | <b>Never</b> |                       |
| N                                  | 674                     | 68             | 368           | 238          |                       |
| Age, years                         | 67.4 (6.0)              | 66.3 (6.2)     | 67.7 (5.7)    | 67.2 (6.2)   | 0.27                  |
| Sex, male (%)                      | 277 (41%)               | 24 (35%)       | 176 (48%)     | 77 (32%)     | 0.76                  |
| Body mass index, kg/m <sup>2</sup> | 27.5 (4.0)              | 26.0 (3.5)     | 28.0 (4.1)    | 27.1 (3.9)   | 0.03                  |
| Fasting glucose, mmol/l            | 5.42 (0.57)             | 5.32 (0.52)    | 5.49 (0.57)   | 5.35 (0.56)  | 0.74                  |
| Systolic blood pressure, mmHg      | 144.7 (22.2)            | 139.9 (19.4)   | 145.9 (23.0)  | 144.3 (21.4) | 0.11                  |
| Diastolic blood pressure, mmHg     | 84.5 (11.7)             | 81.3 (10.0)    | 85.6 (12.3)   | 83.9 (11.0)  | 0.07                  |
| Total cholesterol, mmol/l          | 5.60 (0.99)             | 5.62 (1.05)    | 5.59 (1.00)   | 5.59 (0.97)  | 0.30                  |
| HDL-cholesterol, mmol/l            | 1.55 (0.44)             | 1.60 (0.56)    | 1.52 (0.43)   | 1.58 (0.42)  | 0.77                  |
| Triglycerides, mmol/l              | 1.42 (0.79)             | 1.44 (0.75)    | 1.50 (0.88)   | 1.28 (0.60)  | 0.11                  |
| Fasting <sup>b</sup> , yes (%)     | 673 (99.9%)             | 68 (100%)      | 367 (99.7%)   | 238 (100%)   | NA                    |

Data are mean (SD) or n (%).

<sup>a</sup>Current versus never smokers.

<sup>b</sup>The subjects who provided blood after an overnight fast.
