# Supplementary material for: Tobacco smoking is associated with DNA methylation of diabetes susceptibility genes
Source: PubMed Central journal article supplement (PMC4826423; doi:10.1007/s00125-016-3872-0), 2016-01-29
Supplement: 125_2016_3872_MOESM4_ESM.pdf [file 125_2016_3872_MOESM4_ESM.pdf]

**Table S3. Significant associations between tobacco smoking and methylation of diabetes genes, adjusted for potential confounding factors.**

| <b>CpG site</b> | <b>Beta</b> | <b>Se</b> | <b>P</b>              | <b>Gene</b>  |
|-----------------|-------------|-----------|-----------------------|--------------|
| cg23161492      | -0.040      | 0.006     | $2.6 \times 10^{-10}$ | <i>ANPEP</i> |
| cg26963277      | -0.025      | 0.004     | $2.5 \times 10^{-8}$  | <i>KCNQ1</i> |
| cg03450842      | -0.012      | 0.003     | $5.8 \times 10^{-4}$  | <i>ZMIZ1</i> |
| cg01744331      | -0.013      | 0.003     | $1.4 \times 10^{-5}$  | <i>KCNQ1</i> |
| cg16556677      | -0.015      | 0.004     | $3.8 \times 10^{-5}$  | <i>KCNQ1</i> |

Adjusted for age, sex, body mass index, houseman estimated white blood cell proportions, batch effects, systolic blood pressure, total cholesterol, HDL-cholesterol, triglycerides (natural logarithm), alcohol consumption and C-reactive protein (natural logarithm).
