# Supplementary material for: Tobacco smoking is associated with DNA methylation of diabetes susceptibility genes
Source: PubMed Central journal article supplement (PMC4826423; doi:10.1007/s00125-016-3872-0), 2016-01-29
Supplement: 125_2016_3872_MOESM6_ESM.pdf [file 125_2016_3872_MOESM6_ESM.pdf]

**Table S5.** Results for the associations between the replicated CpG sites and fasting serum glucose and insulin levels.

| <b>CpG site</b>        | <b>Effect</b> | <b><i>P</i></b> |
|------------------------|---------------|-----------------|
| <i>fasting glucose</i> |               |                 |
| cg23161492             | 0.0015        | 0.58            |
| cg26963277             | -0.0012       | 0.47            |
| cg03450842             | -0.0010       | 0.47            |
| cg01744331             | -0.0003       | 0.79            |
| cg16556677             | -0.0006       | 0.69            |
| <i>fasting insulin</i> |               |                 |
| cg23161492             | 0.0051        | 0.10            |
| cg26963277             | 0.0039        | 0.04            |
| cg03450842             | -0.0002       | 0.93            |
| cg01744331             | 0.011         | 0.45            |
| cg16556677             | 0.0031        | 0.09            |

Effect represents the effect in methylation beta-value per 1-unit increase in fasting glucose (mmol/l) or natural logarithm of insulin (pmol/l). *P* represents the unadjusted p-value.
