# Supplementary material for: Tobacco smoking is associated with DNA methylation of diabetes susceptibility genes
Source: PubMed Central journal article supplement (PMC4826423; doi:10.1007/s00125-016-3872-0), 2016-01-29
Supplement: 125_2016_3872_MOESM7_ESM.pdf [file 125_2016_3872_MOESM7_ESM.pdf]

**Table S6.** Replicated CpG sites, met-QTLs and association with type 2 diabetes.

| <b>CpG site</b>   | <b>SNP</b> | <b>Distance<sup>a</sup></b> | <b>Effect Allele</b> | <b>met-QTL beta</b> | <b>met-QTL <i>P</i></b> | <b>T2D OR</b> | <b>T2D <i>P</i></b>  |
|-------------------|------------|-----------------------------|----------------------|---------------------|-------------------------|---------------|----------------------|
| <b>cg23161492</b> | rs11073891 | 6,792                       | C                    | 0.023               | $1.5 \times 10^{-14}$   | 1.00          | 0.88                 |
| <b>cg26963277</b> | rs231356   | 17,065                      | T                    | -0.010              | $8.9 \times 10^{-6}$    | 1.06          | $1.3 \times 10^{-5}$ |
| <b>cg01744331</b> | rs231356   | 17,015                      | T                    | -0.011              | $2.5 \times 10^{-6}$    | 1.06          | $1.3 \times 10^{-5}$ |
| <b>cg16556677</b> | rs2283194  | 265                         | G                    | -0.011              | $3.2 \times 10^{-5}$    | 1.00          | 0.95                 |

<sup>a</sup>Distance between CpG sites and met-QTL SNP.
